# Supplementary material for: G protein-coupled estrogen receptor mediates anti-inflammatory action in Crohn’s disease
Source: PubMed Central journal article supplement (PMC6494840; doi:10.1038/s41598-019-43233-3), 2019-05-01
Supplement: 41598_2019_43233_MOESM1_ESM.pdf [file 41598_2019_43233_MOESM1_ESM.pdf]

Supplementary information

**G protein-coupled estrogen receptor mediates anti-inflammatory action in Crohn's disease**

Damian Jacenik<sup>a\*</sup>, Marta Zielińska<sup>b</sup>, Anna Mokrowiecka<sup>c</sup>, Sylwia Michlewska<sup>d,e</sup>,  
Ewa Małecka-Panas<sup>c</sup>, Radziśław Kordek<sup>f</sup>, Jakub Fichna<sup>b</sup>, Wanda M. Krajewska<sup>a\*</sup>

<sup>a</sup> – Department of Cytobiochemistry, Faculty of Biology and Environmental Protection, University of Lodz, Pomorska St. 141/143, 90-236 Lodz, Poland

<sup>b</sup> – Department of Biochemistry, Faculty of Medicine, Medical University of Lodz, Mazowiecka St. 6/8, 92-215 Lodz, Poland

<sup>c</sup> – Department of Digestive Tract Diseases, Faculty of Medicine, Medical University of Lodz, Stefana Kopcinskiego St. 22, 90-001 Lodz, Poland

<sup>d</sup> – Department of General Biophysics, Faculty of Biology and Environmental Protection, University of Lodz, Pomorska St. 141/143, 90-236 Lodz, Poland

<sup>e</sup> – Laboratory of Microscopic Imaging and Specialized Biological Techniques, Faculty of Biology and Environmental Protection, University of Lodz, Banacha St. 12/16, 90-237 Lodz, Poland

<sup>f</sup> – Department of Pathology, Chair of Oncology, Medical University of Lodz, Pomorska St. 521, 92-213 Lodz, Poland

\* – corresponding author: Damian Jacenik, Department of Cytobiochemistry, Faculty of Biology and Environmental Protection, University of Lodz, Pomorska St. 141/143, 90-236 Lodz, Poland, tel: +48 42 635 52 99, email: damian.jacenik@biol.uni.lodz.pl

\* – corresponding author: Wanda M. Krajewska, Department of Cytobiochemistry, Faculty of Biology and Environmental Protection, University of Lodz, Pomorska St. 141/143, 90-236 Lodz, Poland, tel: +48 42 635 44 87, email: wanda.krajewska@biol.uni.lodz.pl

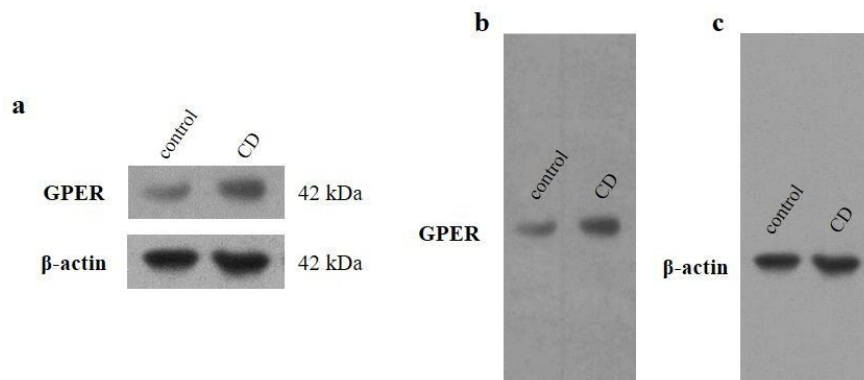

**Supplementary Figure S1.** Representative main figure (a) and representative image of full-length immunoblot from GPER (b) and β-actin (c) protein expression analysis in colon section obtained from control and CD patients.

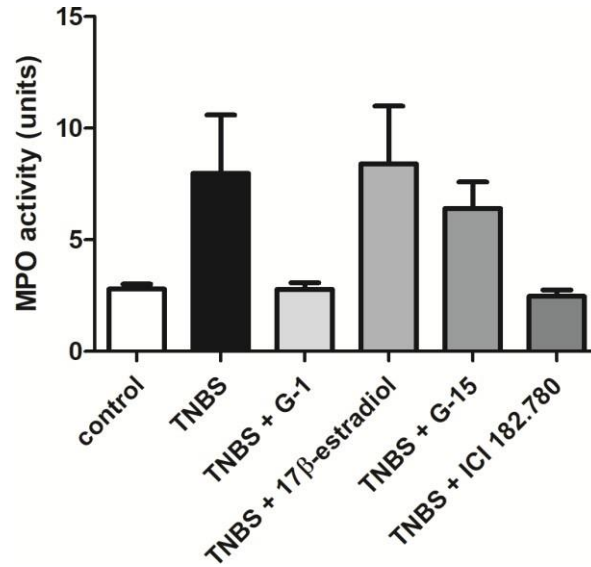

**Supplementary Figure S2.** MPO activity in colon section obtained from control, TNBS and treated groups. Data are presented as means  $\pm$  SEM. 10 – 15 mice per group.

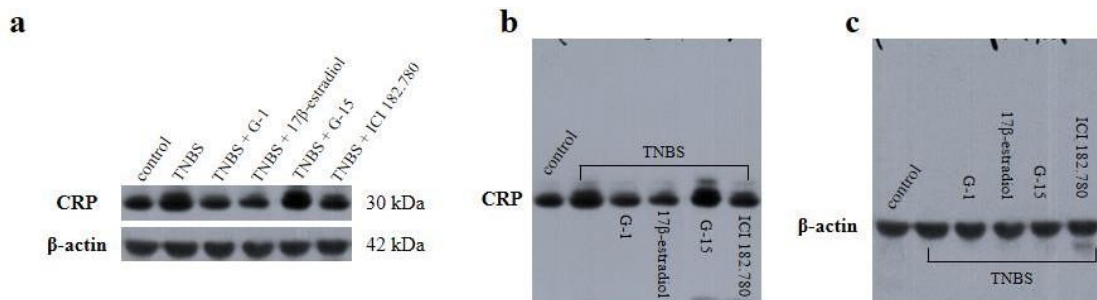

**Supplementary Figure S3.** Representative main figure (a) and representative image of full-length immunoblot from CRP (b) and  $\beta$ -actin (c) protein expression analysis in colon section obtained from control, TNBS and treated groups. 10 – 15 mice per group.

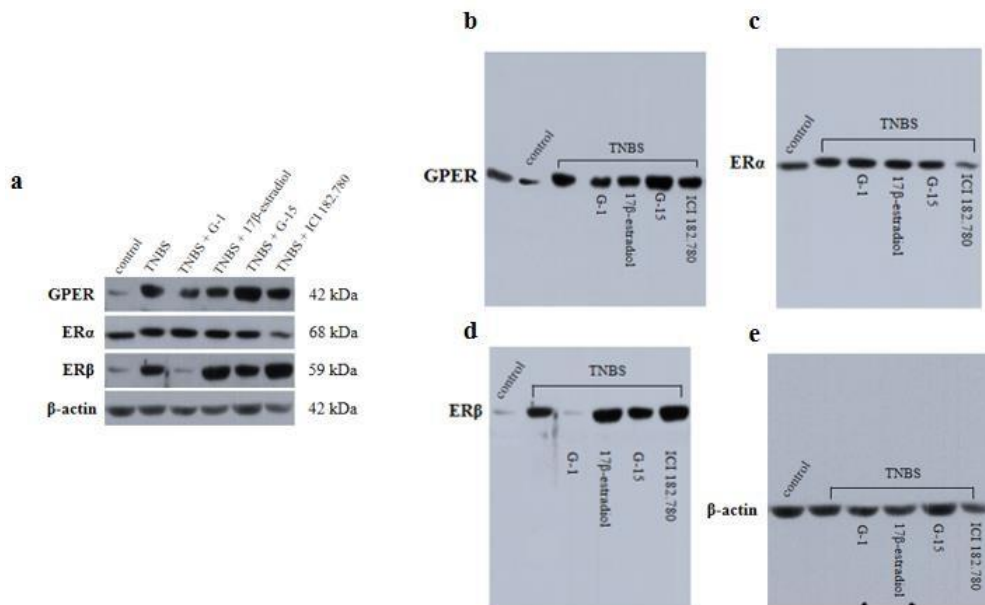

**Supplementary Figure S4.** Representative main figure (a) and representative image of full-length immunoblot from GPER (b), ERα (c), ERβ (d) and β-actin (e) protein expression analysis in colon section obtained from control, TNBS and treated groups. 10 – 15 mice per group.

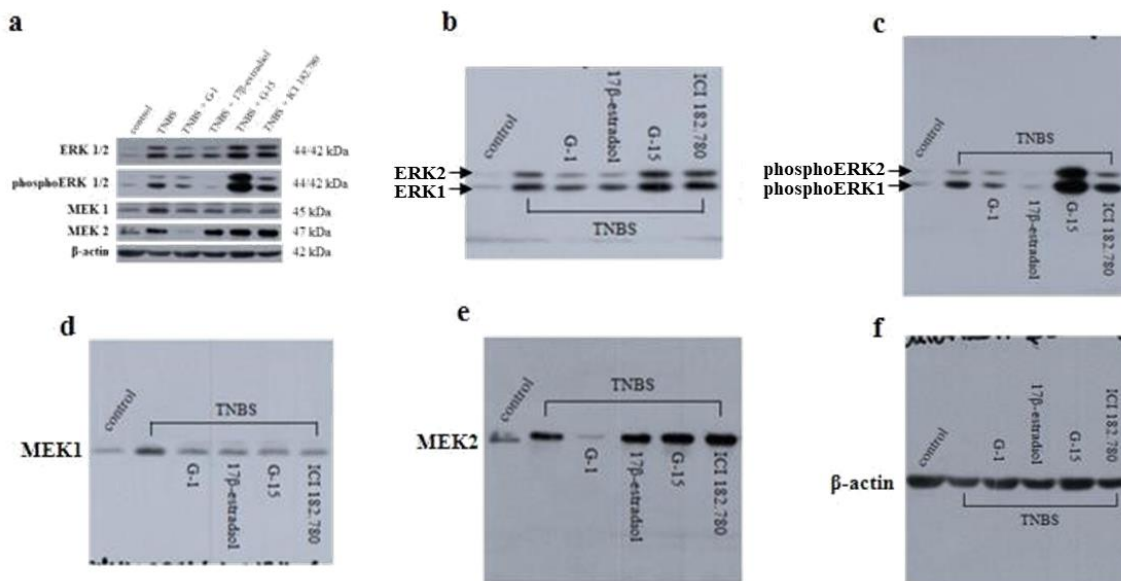

**Supplementary Figure S5.** Representative main figure (a) and representative image of full-length immunoblot from ERK1/2 (b), phosphoERK1/2 (c), MEK1 (d), MEK2 (e) and β-actin (f) protein expression analysis in colon section obtained from control, TNBS and treated groups. 10 – 15 mice per group

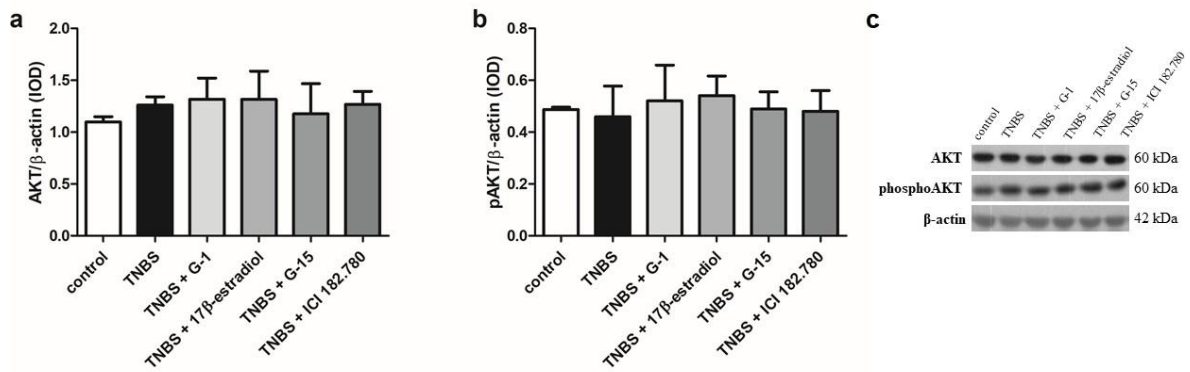

**Supplementary Figure S6.** AKT (a) and phosphoAKT (b) protein level and representative immunoblot of AKT and phosphoAKT protein analysis (c) in colon section obtained from control, TNBS and treated groups. 10 – 15 mice per group.

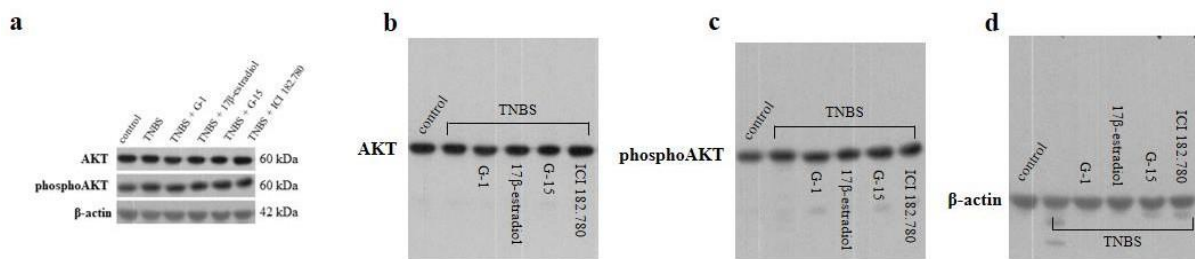

**Supplementary Figure S7.** Representative main figure (a) and representative image of full-length immunoblot from AKT (b), phosphoAKT (c) and β-actin (d) protein expression analysis in colon section obtained from control, TNBS and treated groups. 10 – 15 mice per group.

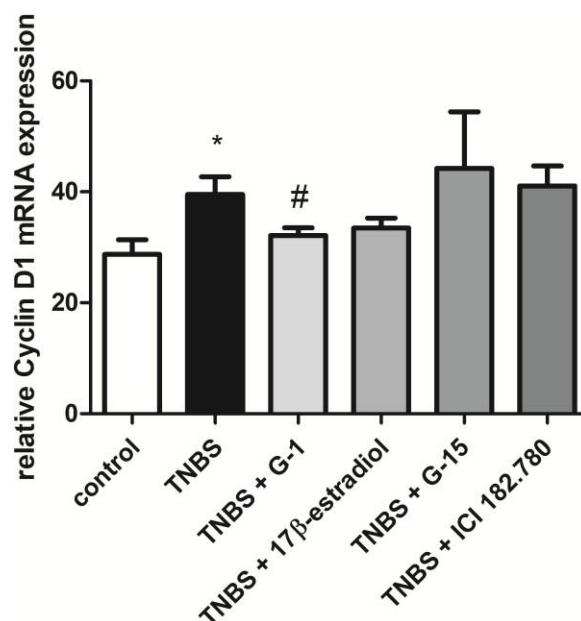

**Supplementary Figure S8.** Cyclin D1 expression at the mRNA level in colon section obtained from control, TNBS and treated groups. Data are presented as means ± SEM; \* $P < 0.05$  vs. control; # $P < 0.05$  vs. TNBS. 10 – 15 mice per group.

**Supplementary Table S1.** TaqMan® gene expression assays ID used in real-time PCR analysis and their amplicon length.

| <b>Species</b> | <b>Gene</b>  | <b>Assay ID</b> | <b>Amplicon length</b> |
|----------------|--------------|-----------------|------------------------|
| <b>Human</b>   | <i>GPER</i>  | Hs00173506_m1   | 58                     |
|                | <i>GAPDH</i> | Hs99999905_m1   | 122                    |
| <b>Mouse</b>   | <i>Gper</i>  | Mm01194815_m1   | 53                     |
|                | <i>Ccnd1</i> | Mm00432359_m1   | 58                     |
|                | <i>Cox-2</i> | Mm00478374_m1   | 80                     |
|                | <i>Esr1</i>  | Mm00433149_m1   | 56                     |
|                | <i>Esr2</i>  | Mm00599821_m1   | 69                     |
|                | <i>Esrra</i> | Mm00433143_m1   | 133                    |
|                | <i>Esrrβ</i> | Mm00442411_m1   | 55                     |
|                | <i>Esrrγ</i> | Mm01314576_m1   | 61                     |
|                | <i>Nos2</i>  | Mm00440502_m1   | 66                     |
|                | <i>Rela</i>  | Mm00501346_m1   | 67                     |
|                | <i>Stat3</i> | Mm00456968_m1   | 120                    |
|                | <i>Trpv4</i> | Mm00499025_m1   | 56                     |
|                | <i>Vegfa</i> | Mm00437306_m1   | 61                     |
|                | <i>Gapdh</i> | Mm99999915_g1   | 109                    |

**Supplementary Table S2.** Table 2. TaqMan® microRNA assays ID and their sequence used in real-time PCR analysis.

| <b>Gene</b> | <b>Sequence</b>        | <b>Assay ID</b> |
|-------------|------------------------|-----------------|
| miR-145     | GUCCAGUUUCCAGGAAUCCCU  | 002278          |
| miR-148-5p  | AAAGUUCUGAGACACUCCGACU | 002134          |
| miR-592     | UUGUGUCAUAUGCGAUGAUGU  | 001546          |
| miR-26b     | UUCAAGUAAUUCAGGAUAGGU  | 000407          |
